# Supplementary figures and images for: Calcium and Vitamin D Supplementation for Prevention of Preeclampsia: A Systematic Review and Network Meta-Analysis
Source: MDPI journal article supplement (doi:10.3390/nu9101141), 2017-10-18

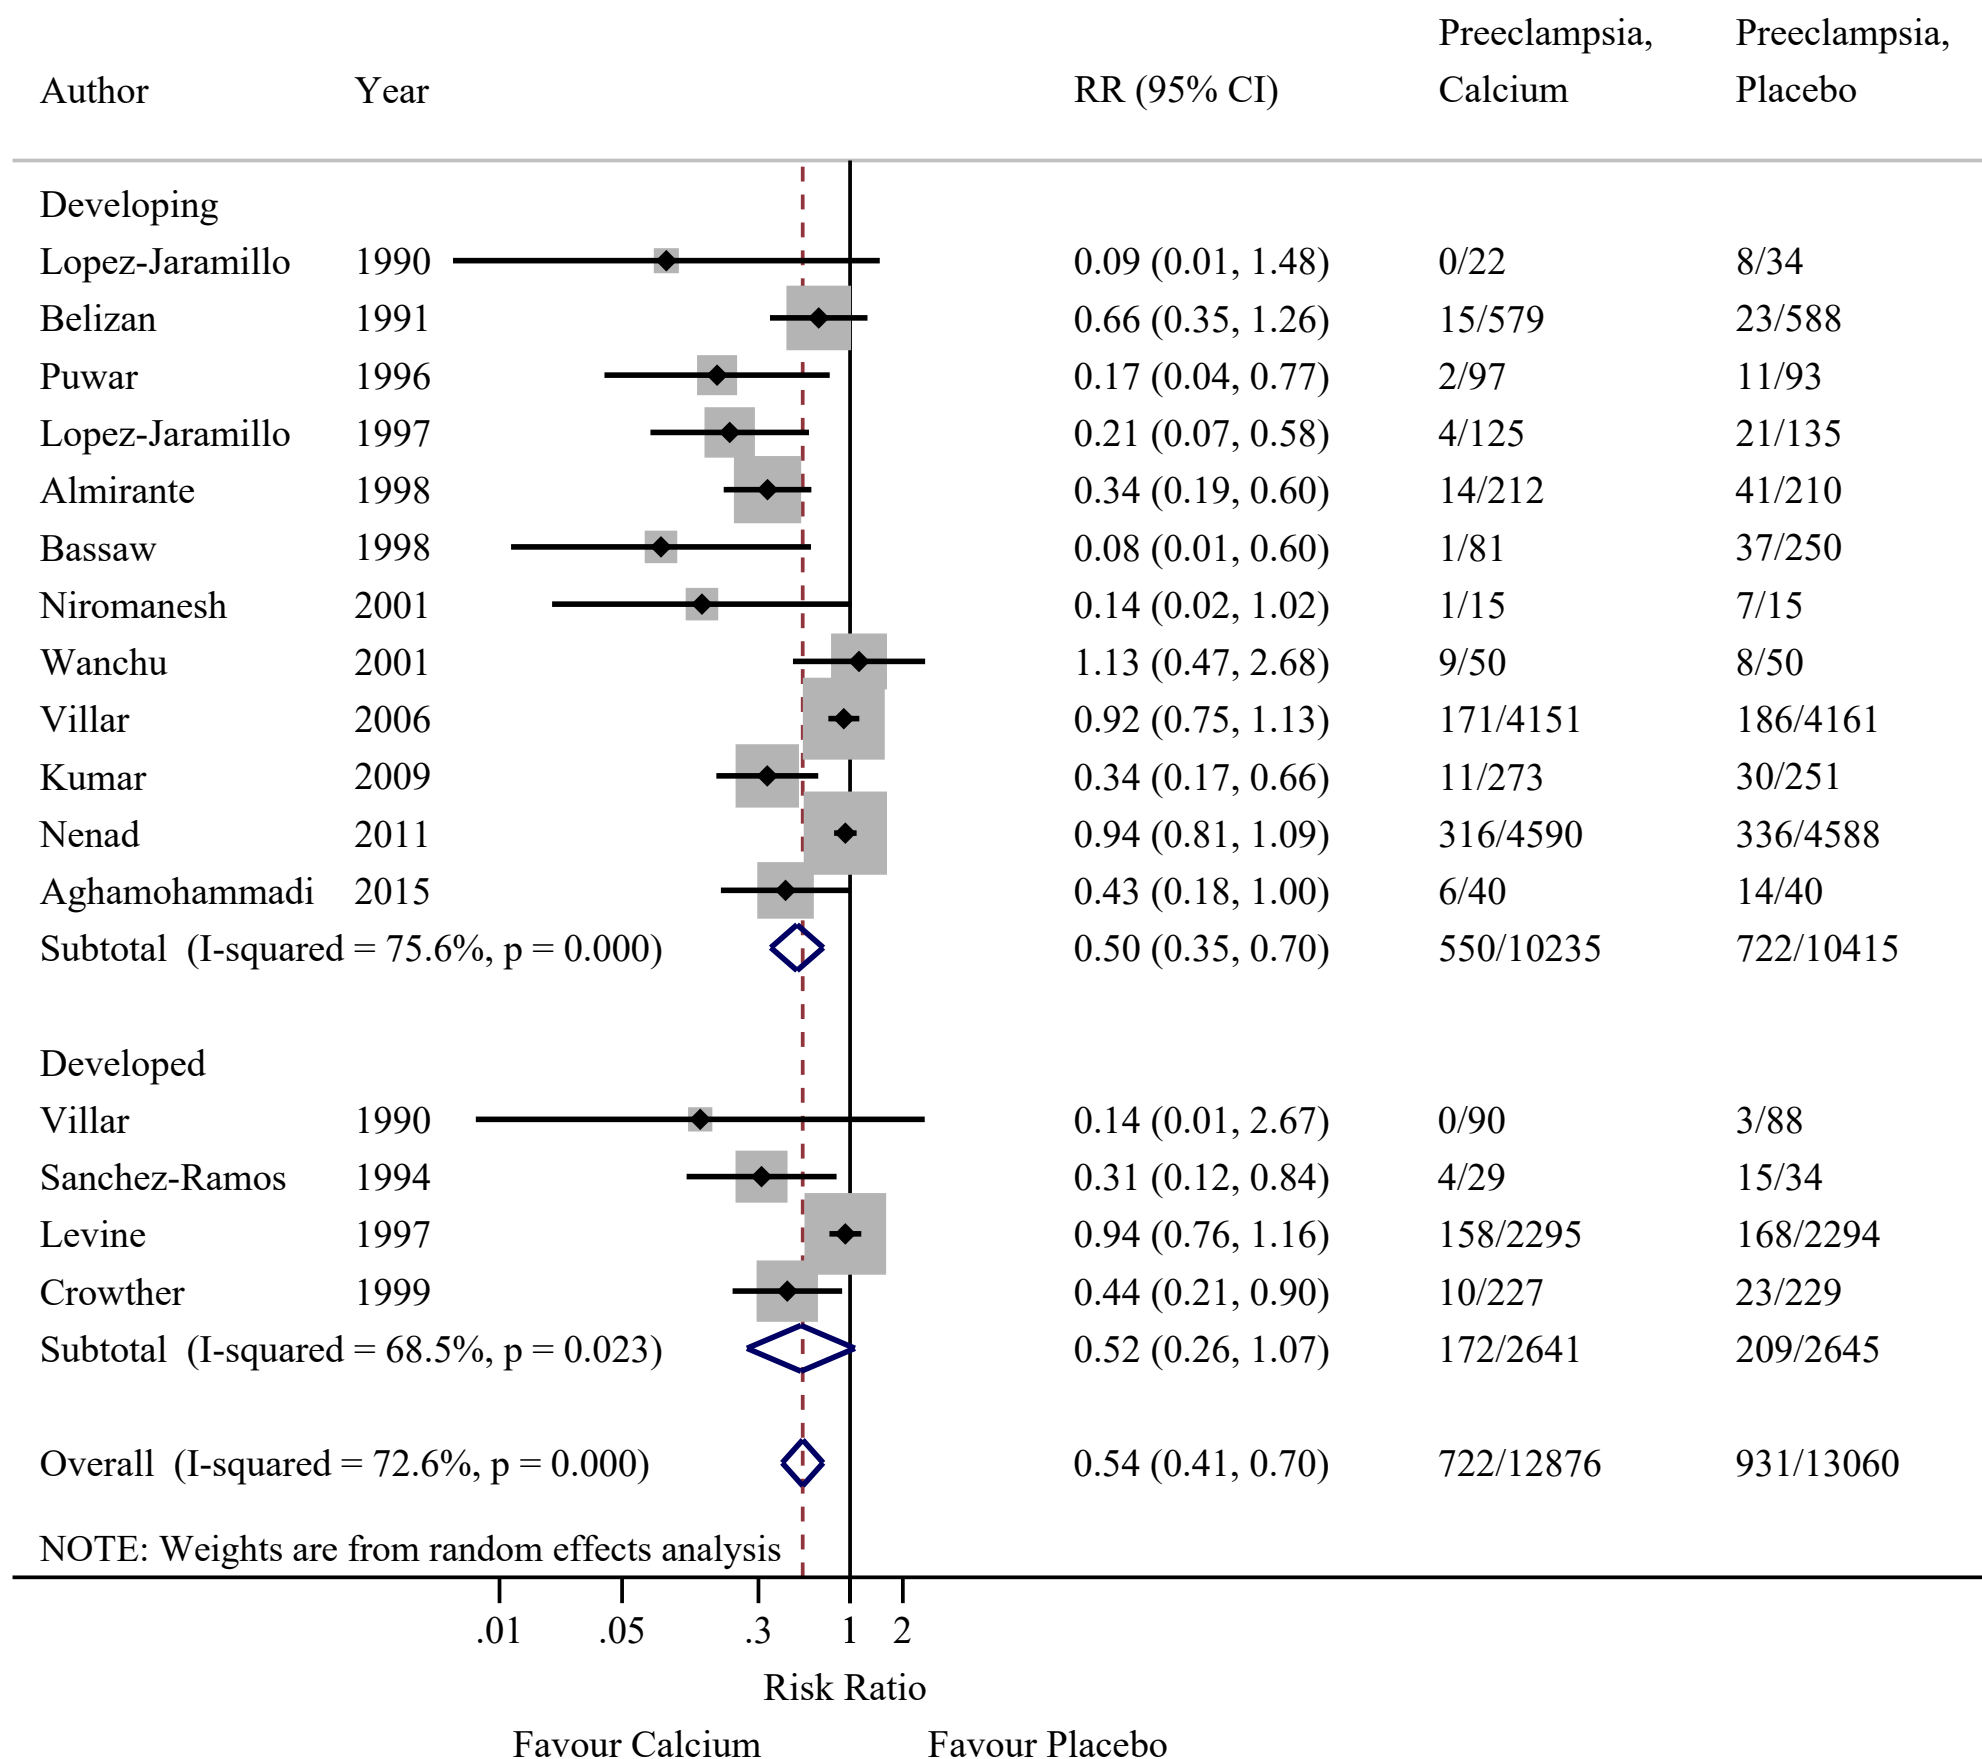

Supplement: s1 [file s1]

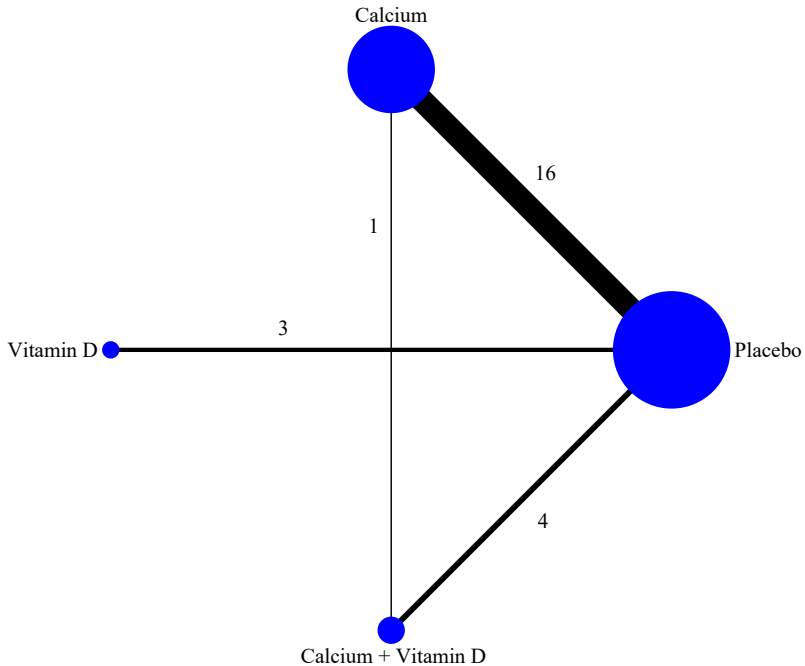

Supplement: s1 [file s1]

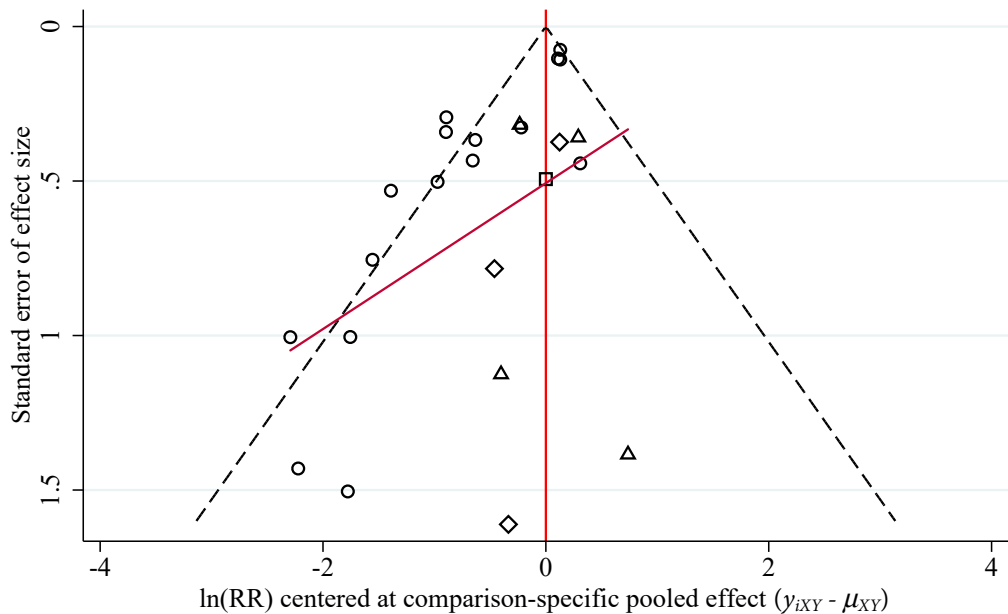

Supplement: s1 [file s1]

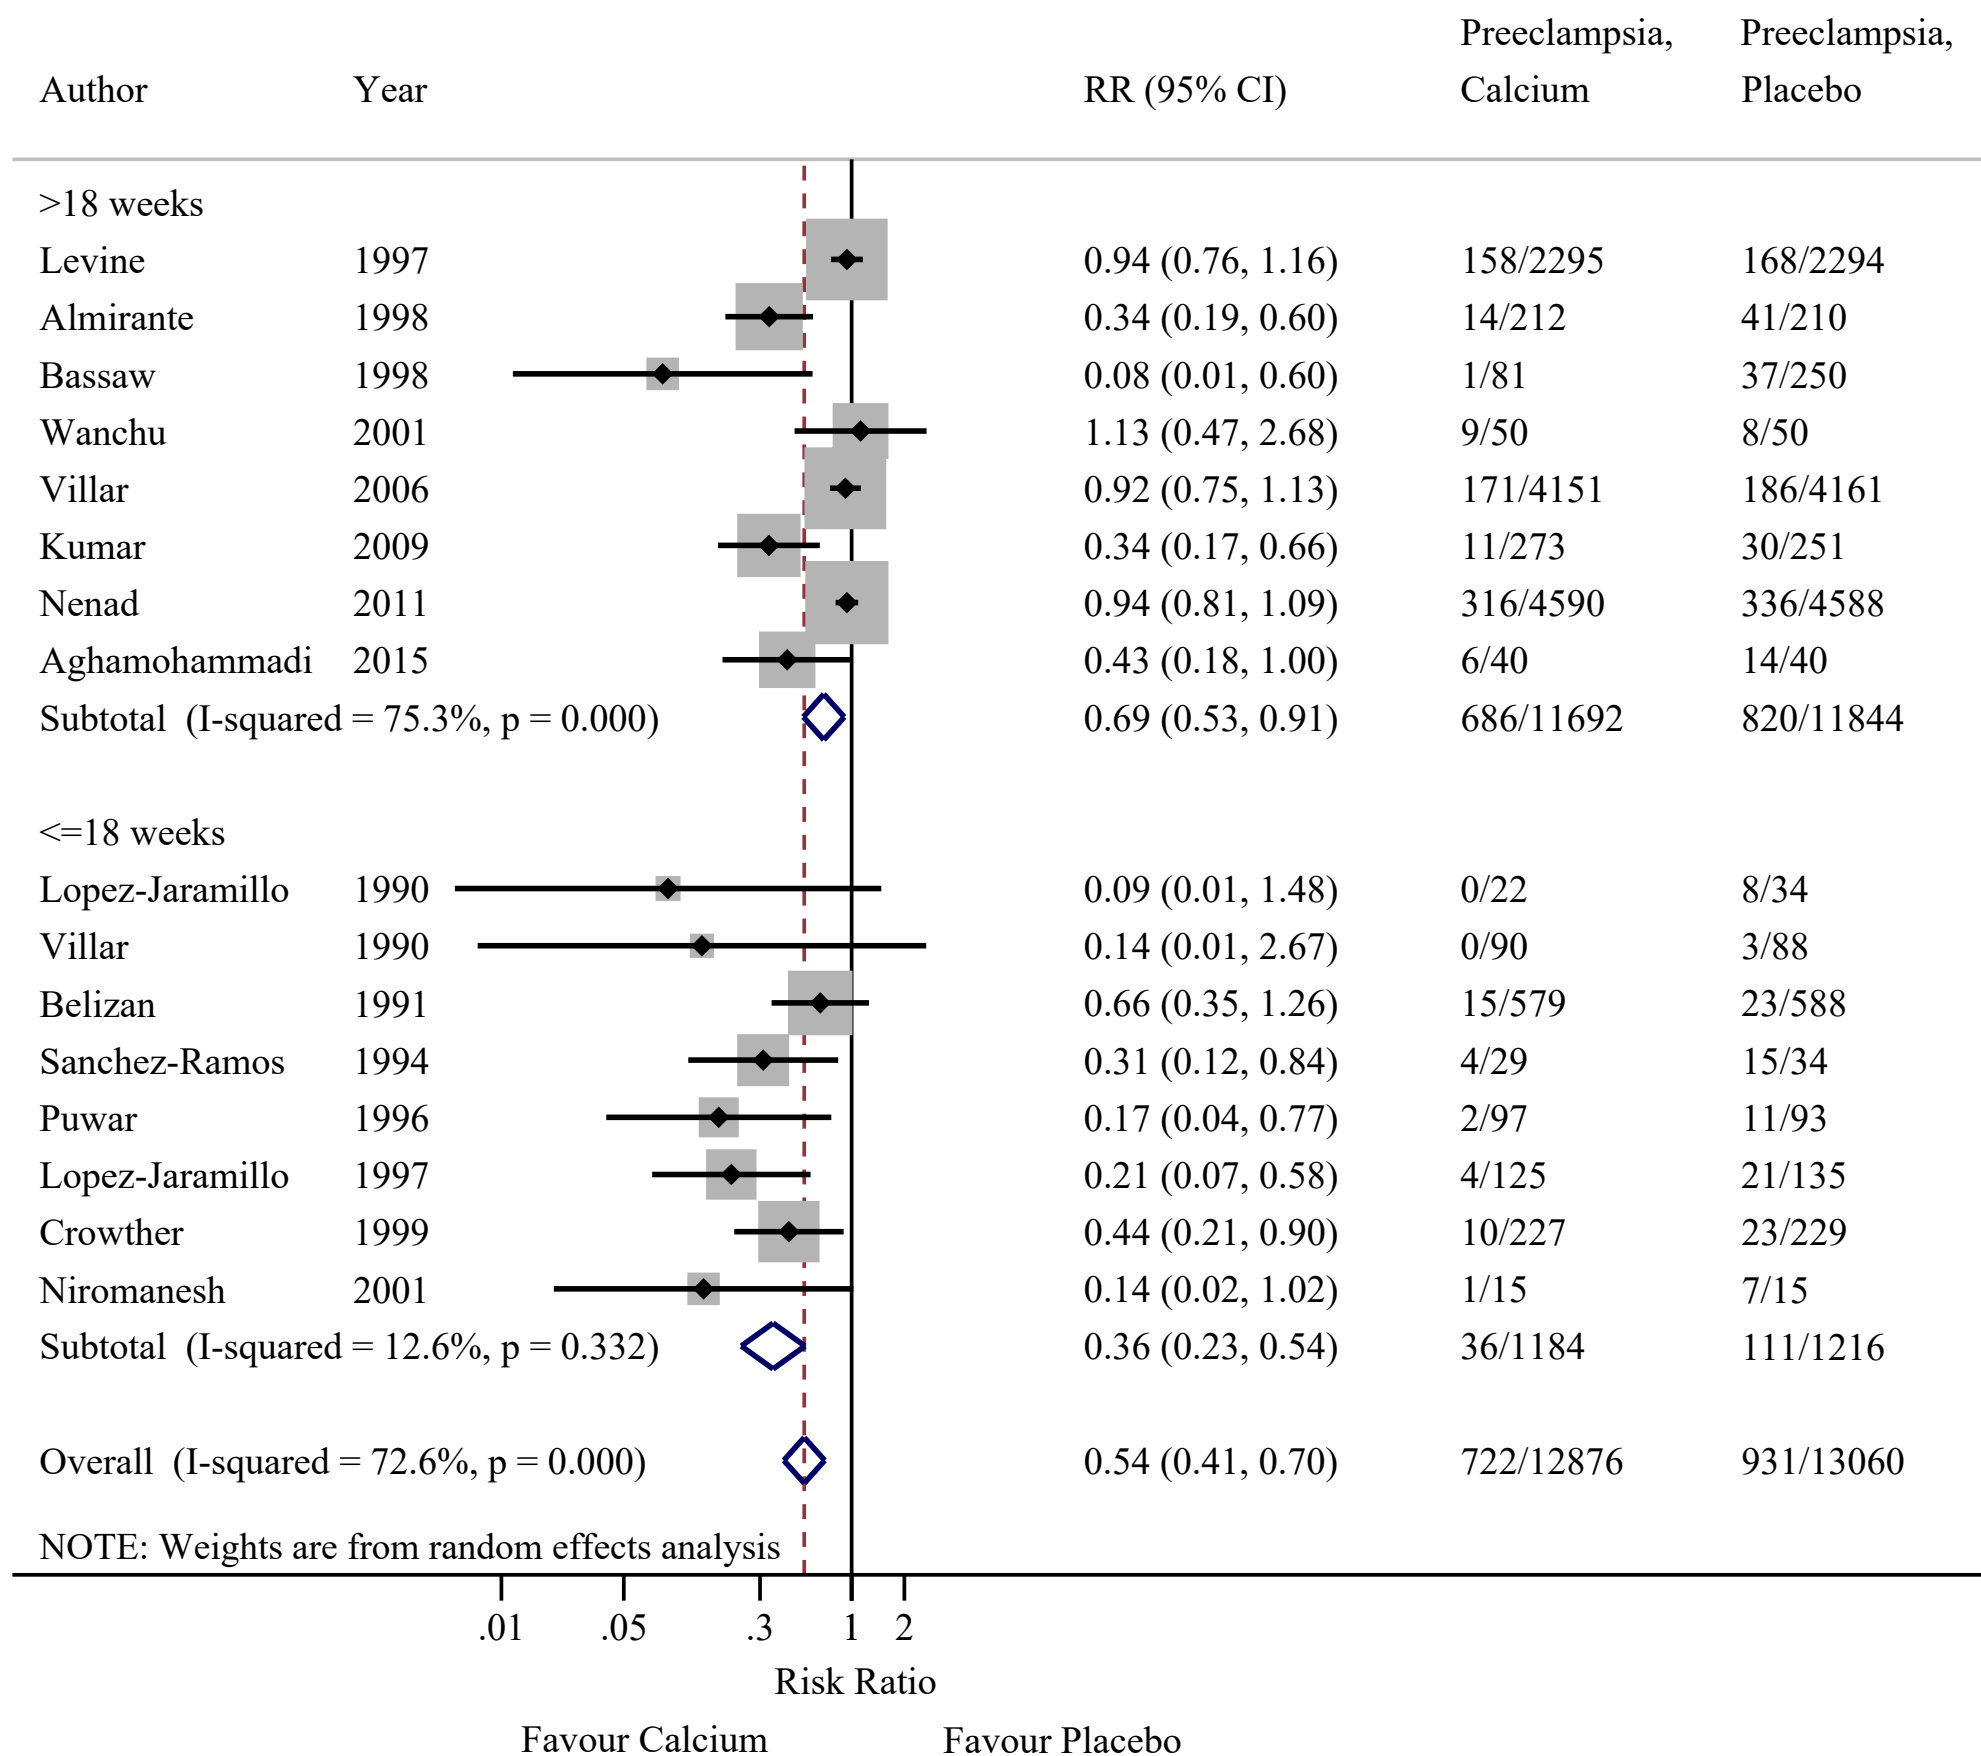

Supplement: s1 [file s1]

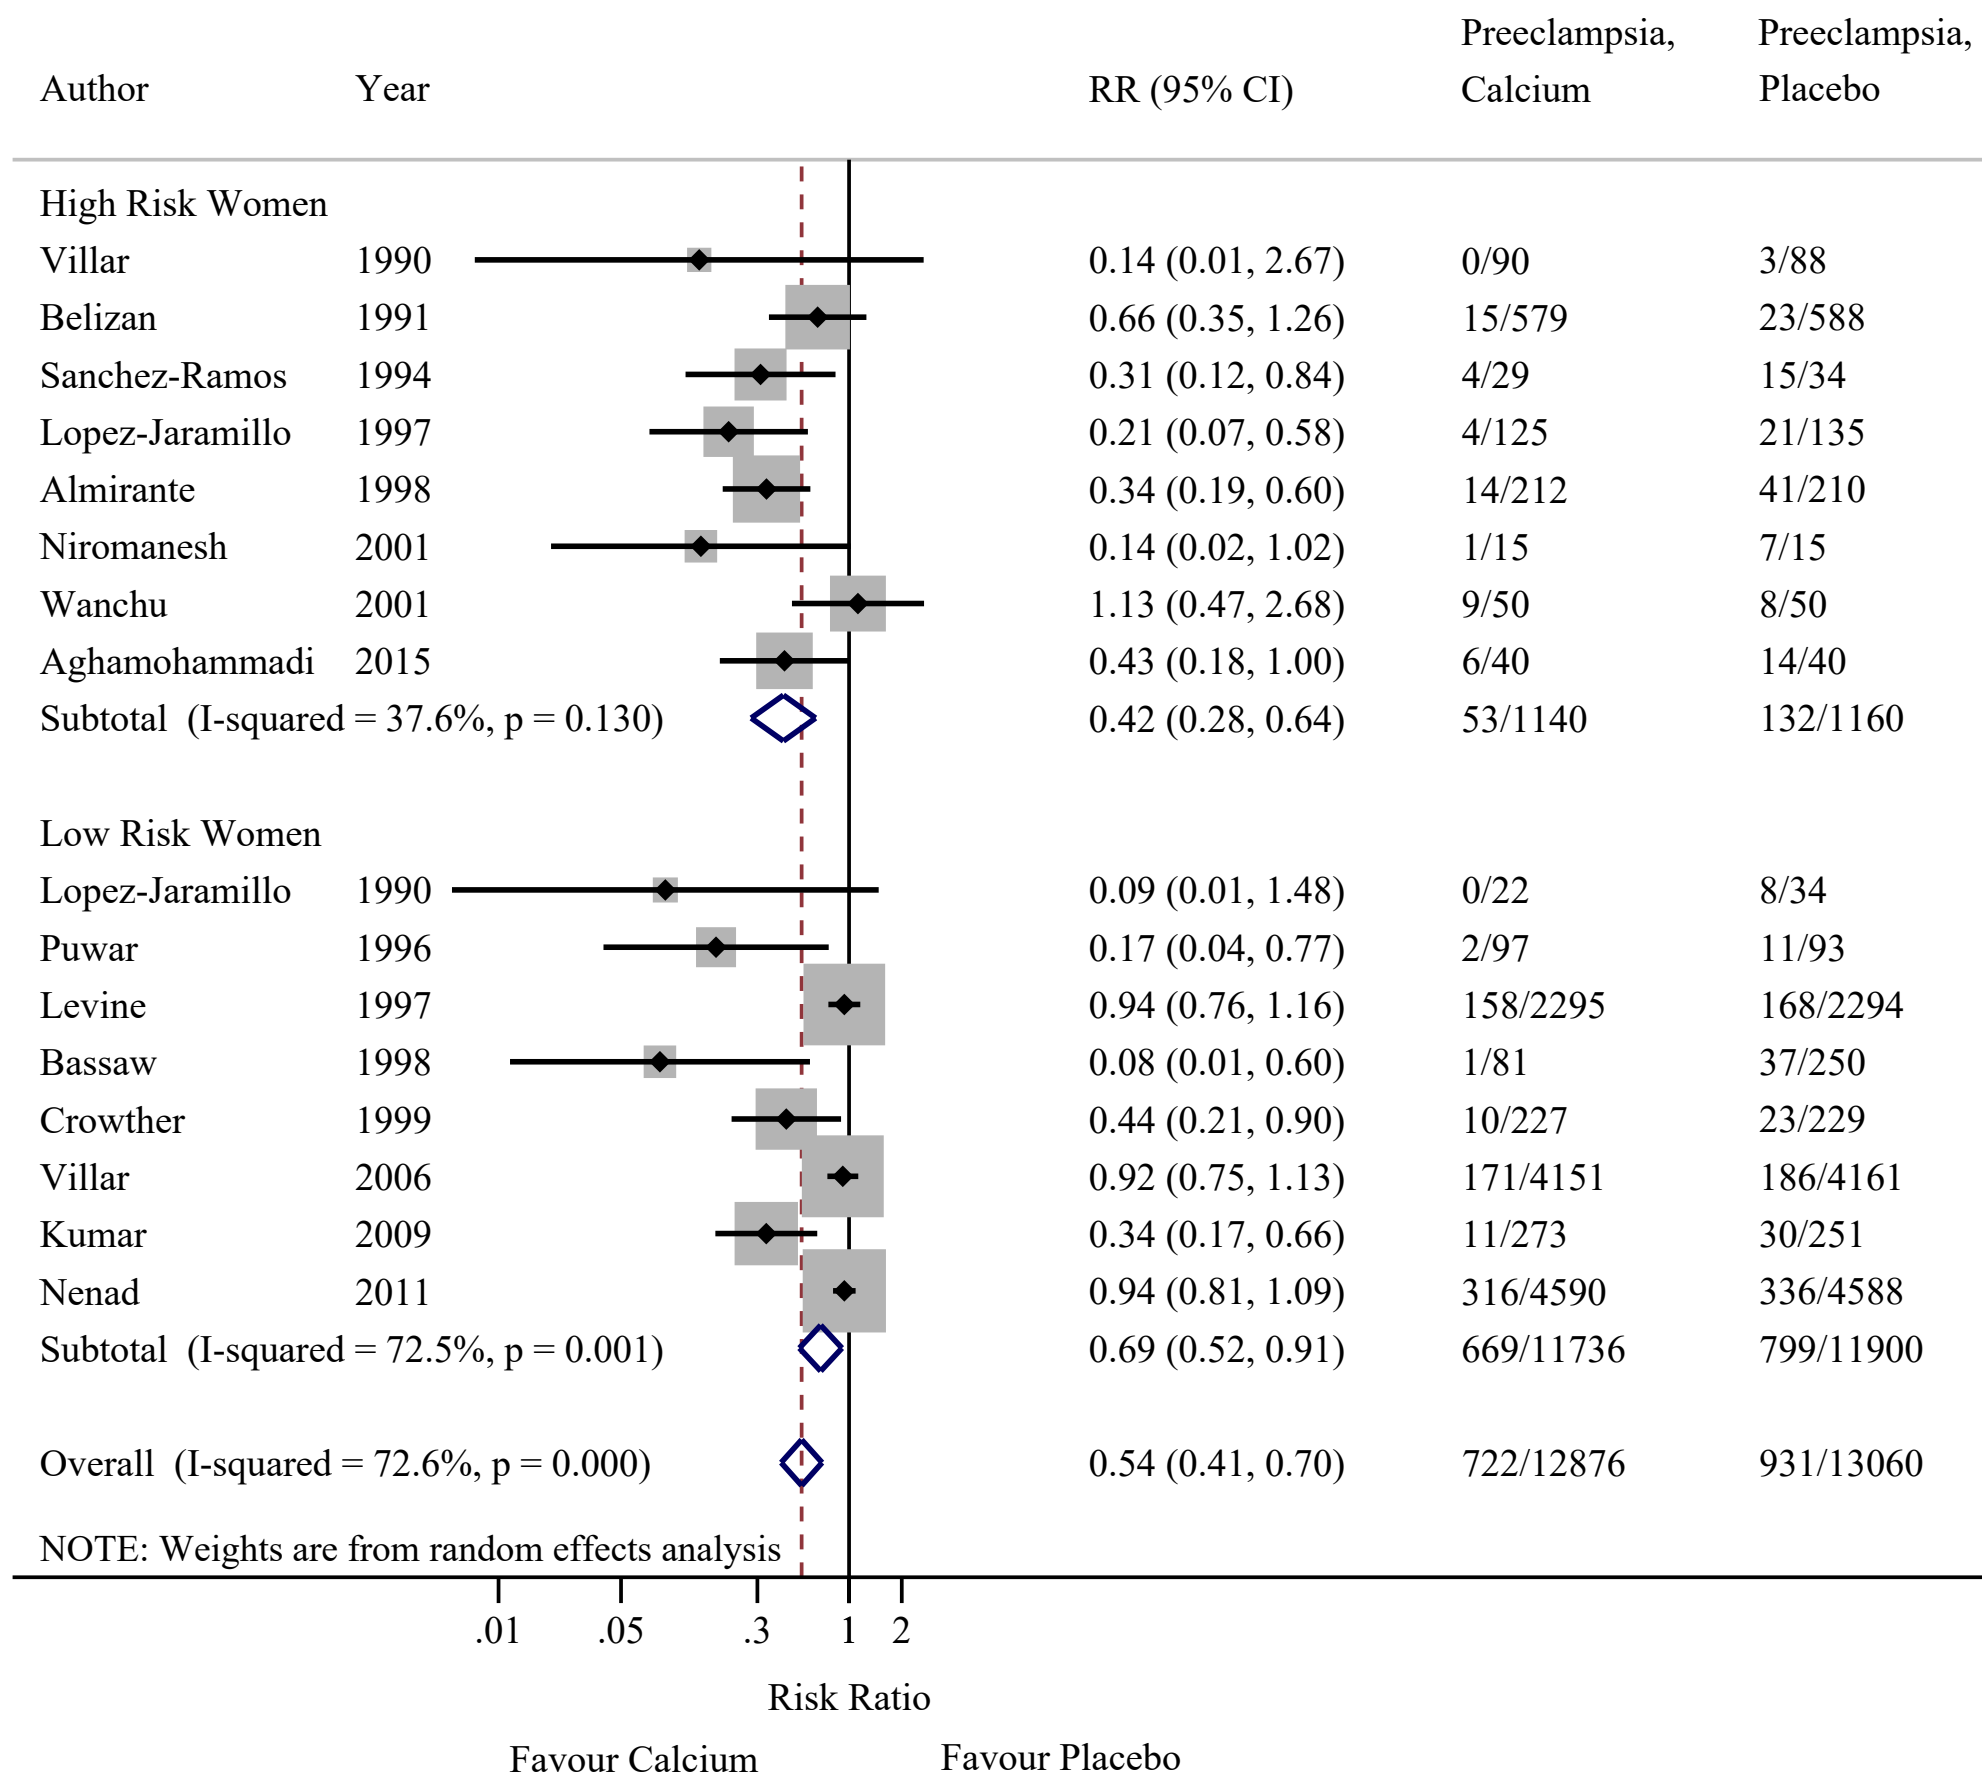

Supplement: s1 [file s1]

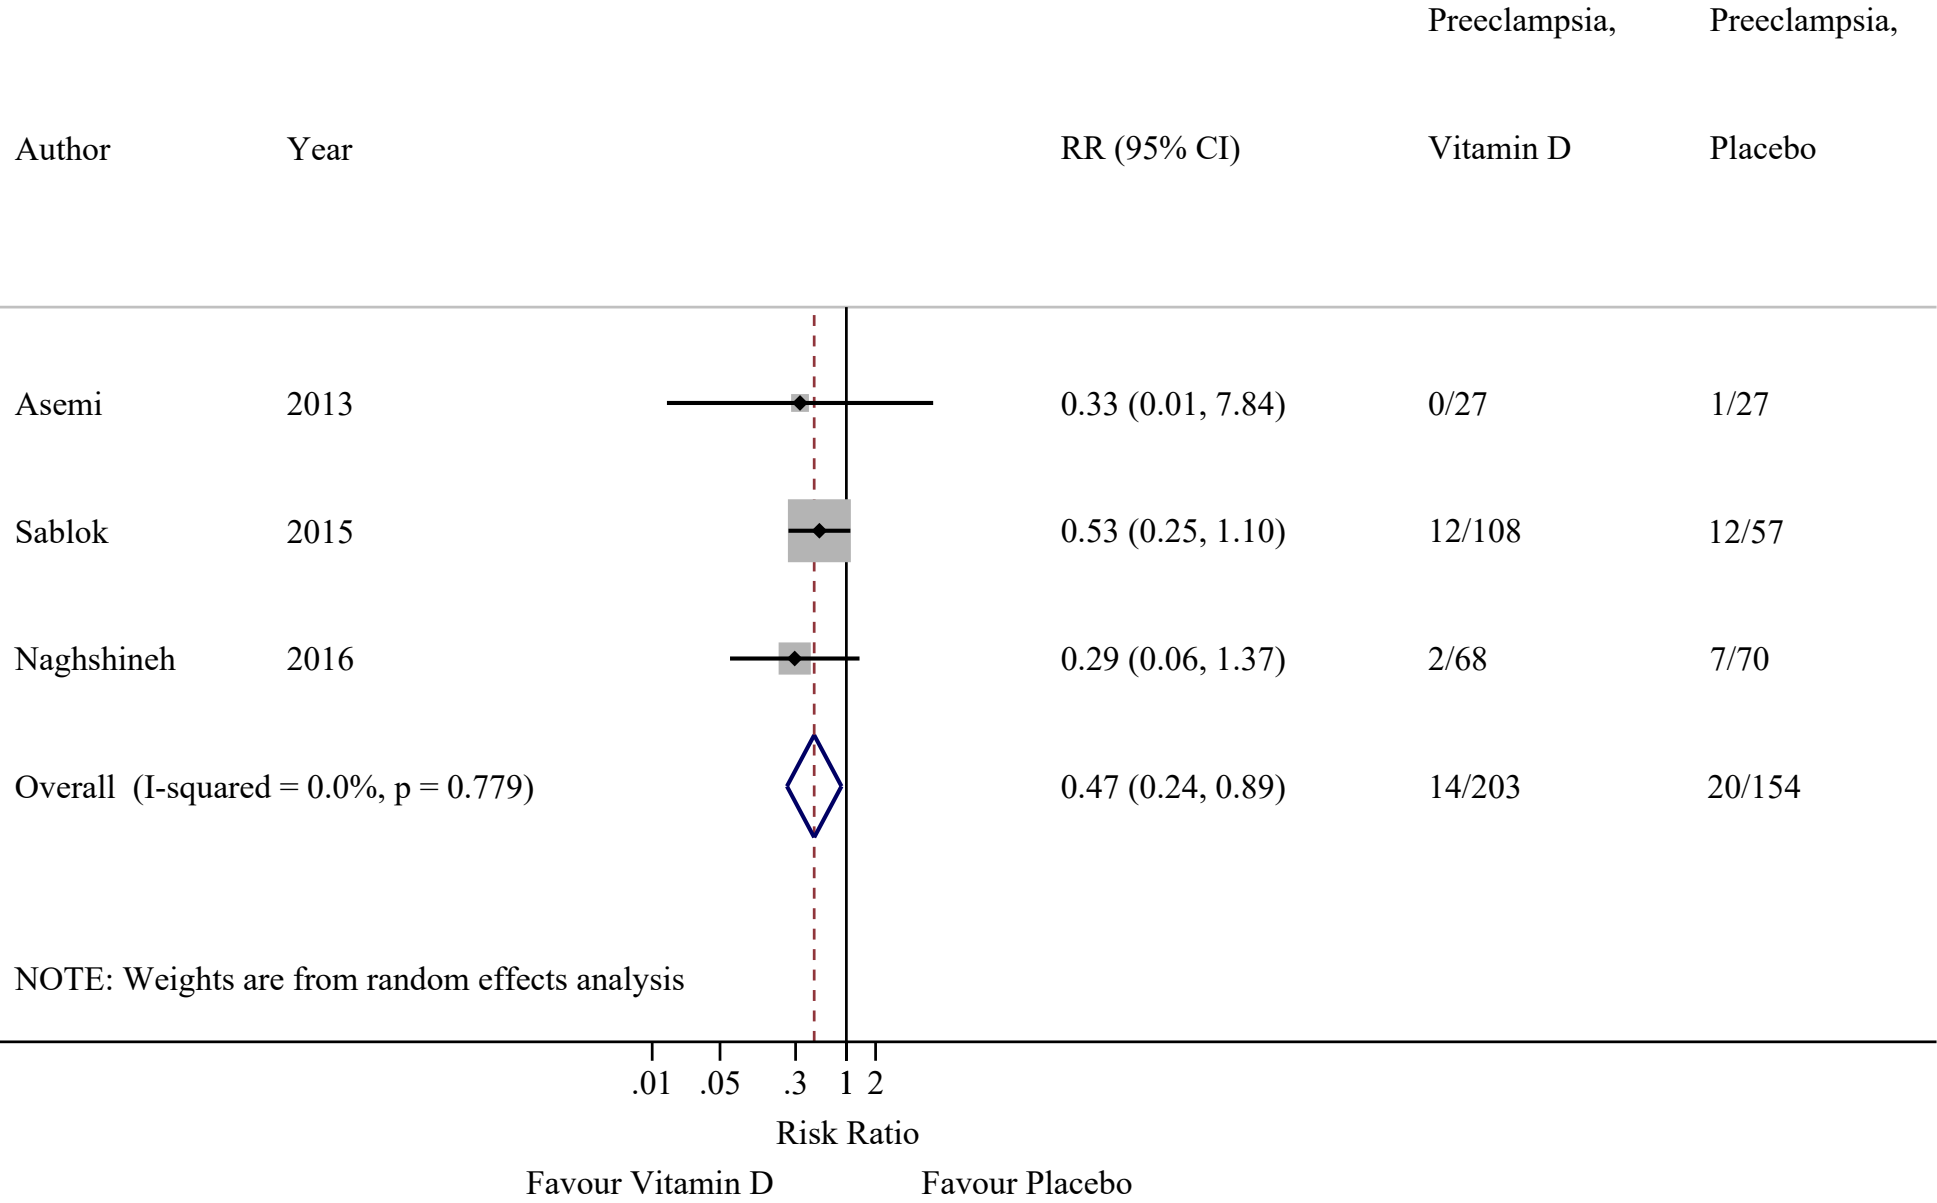

Supplement: s1 [file s1]

## Risk of Bias Assessment

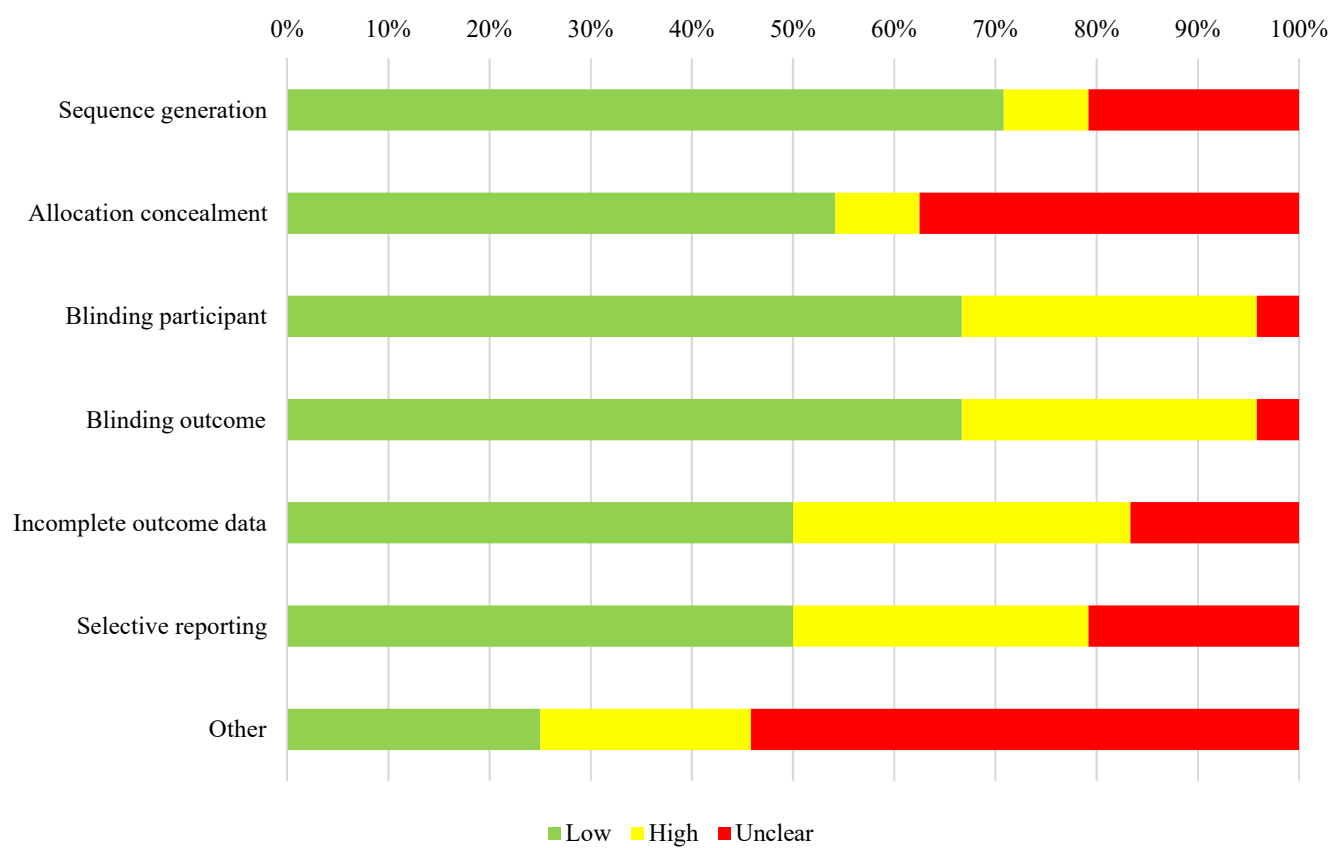

Supplement: s1 [file s1]

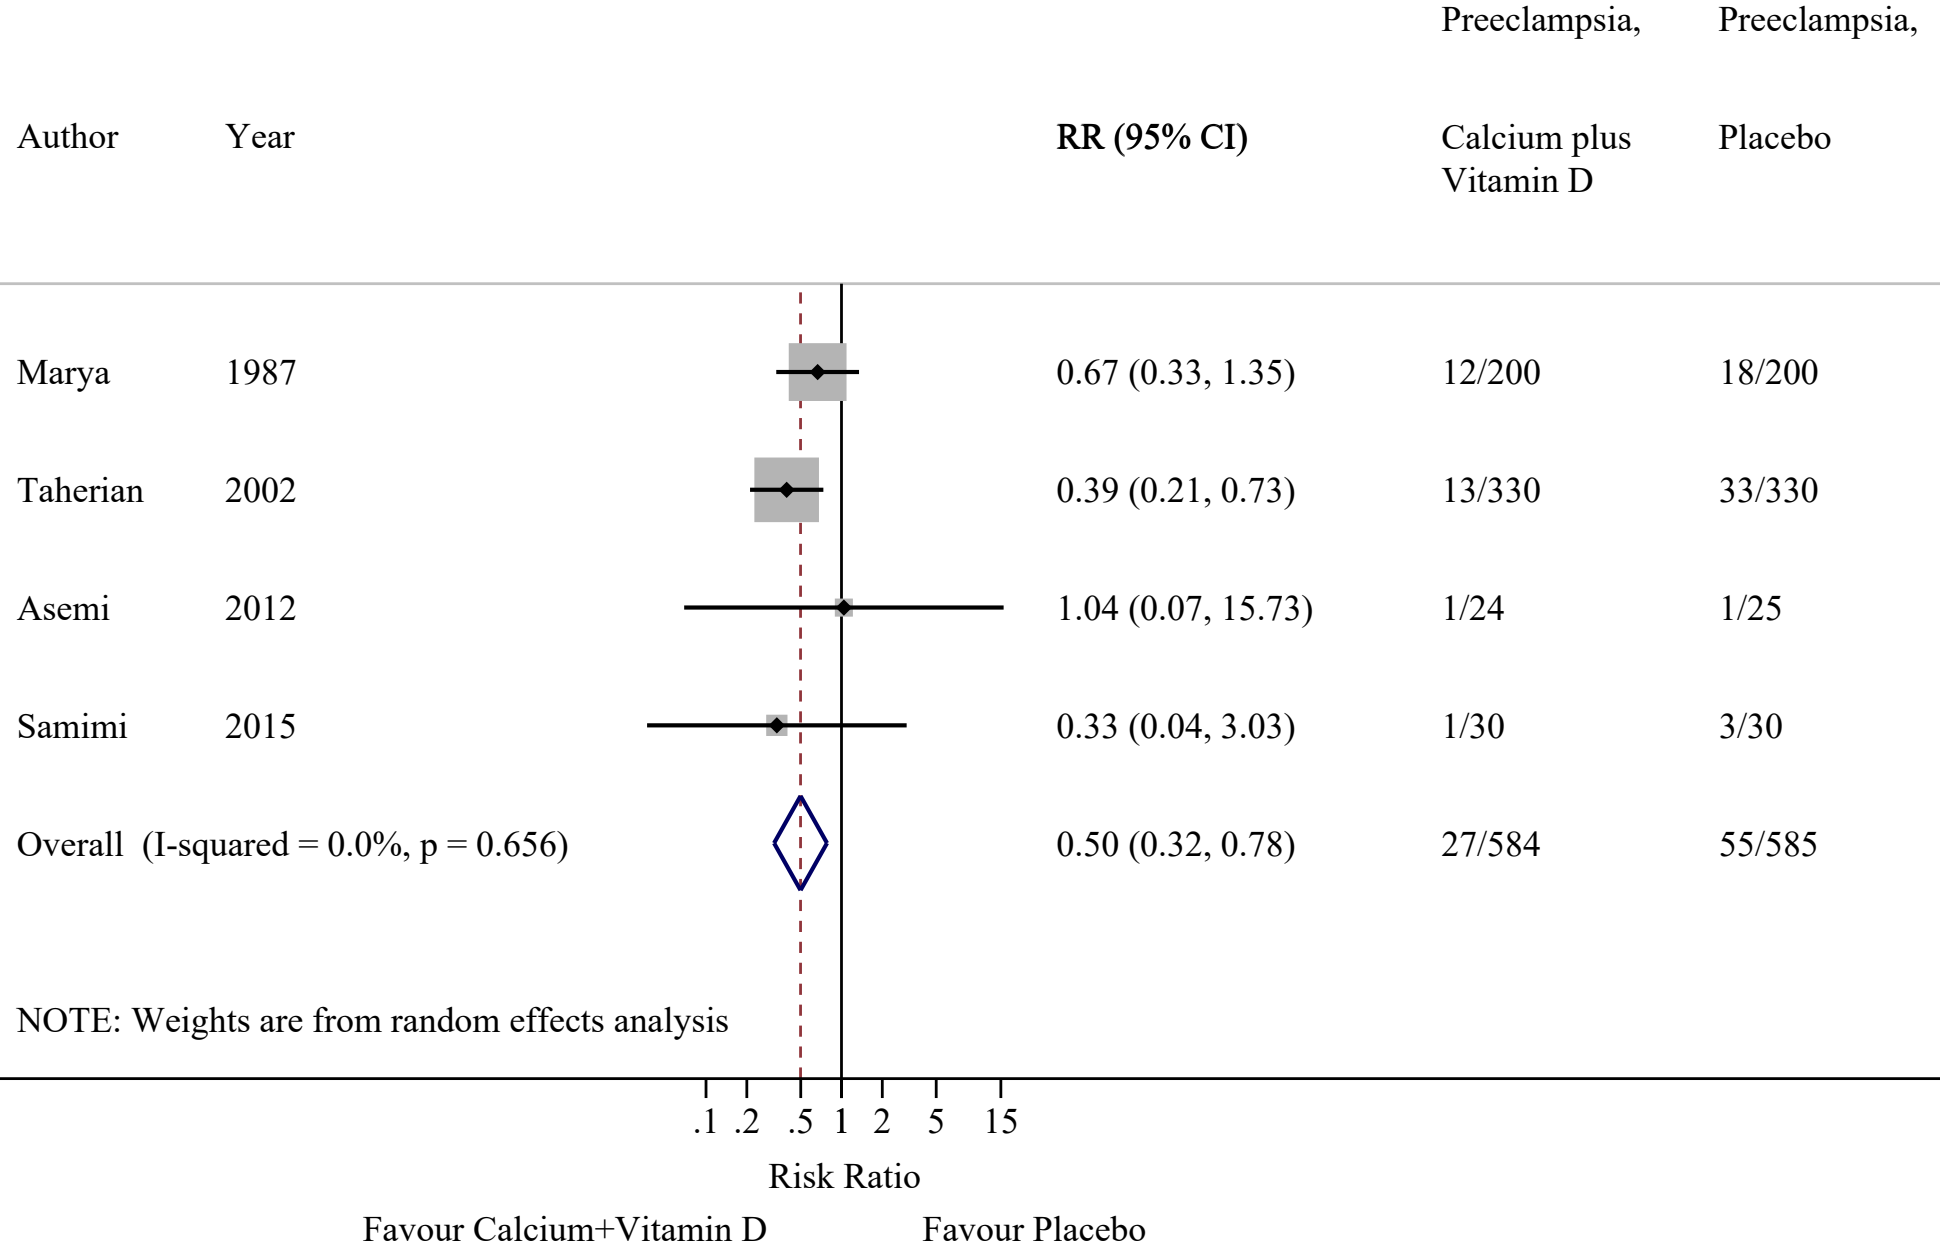

Supplement: s1 [file s1]

Probabilities

Calcium

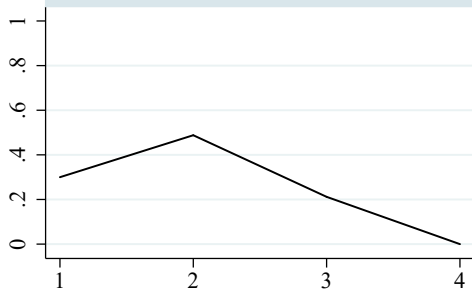

Calcium plus Vitamin D

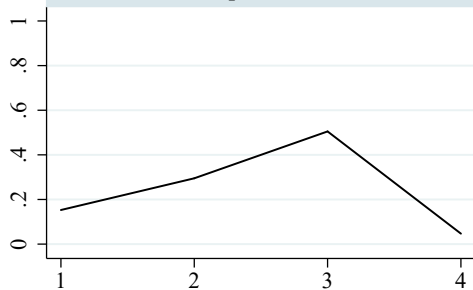

Placebo

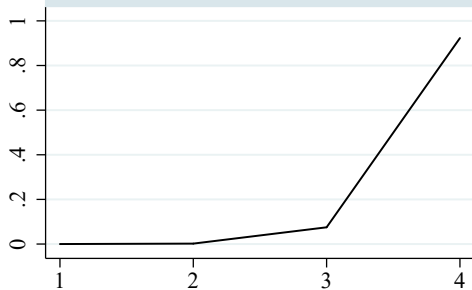

Vitamin D

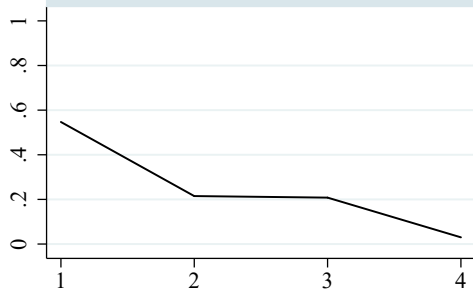

Rank

Supplement: s1 [file s1]
